# Supplementary material
Source: Springer Nature journal article supplement (https://www.springermedizin.de/resource/supplementary/12936_2012_2511_MOESM1_ESM.pdf/9543116)

### A) Closed Storage

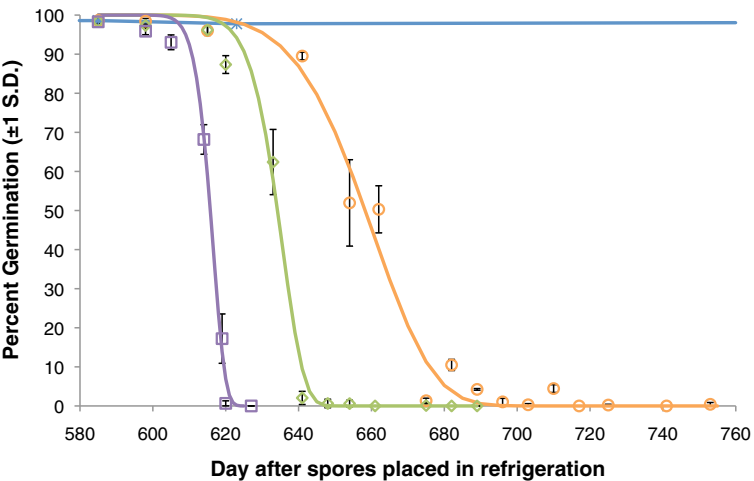

### B) Open storage

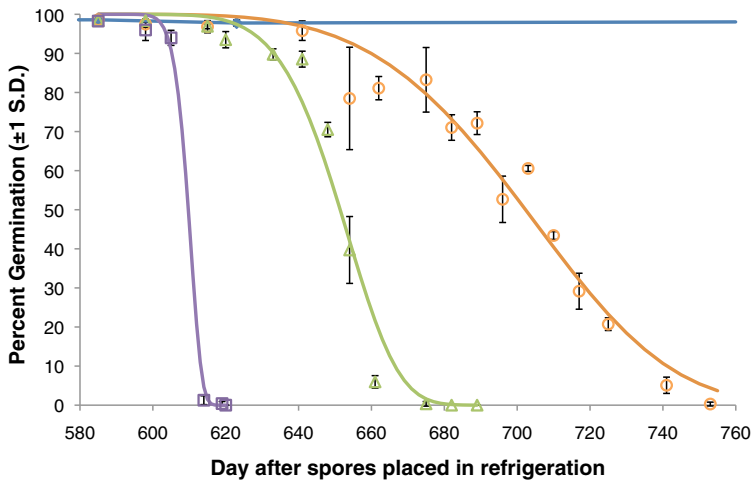

Supplement: MOESM1 [file 9543116]
